# Supplementary material
Source: PubMed Central journal article supplement (PMC3393542)

## Supplemental material

### Characterization of a Novel Bipartite Double-stranded RNA Mycovirus Conferring Hypovirulence in the Phytopathogenic Fungus *Botrytis porri*

Mingde Wu, Fengyin Jin, Jing Zhang, Long Yang, Daohong Jiang, and Guoqing Li\*

*The State Key Laboratory of Agricultural Microbiology and the Key Laboratory of Plant Pathology of Hubei Province, Huazhong Agricultural University, Wuhan 430070, Hubei, China.*

\* Corresponding author: Dr. Guoqing Li, 86-27-87286880, E-mail: guoqingli@mail.hzau.edu.cn

**TABLE S1.** Oligonucleotide primers/adaptor used in this study.

**TABLE S2.** Summary of the peptide mass fingerprinting analysis of p85.

**TABLE S3.** Summary of the peptide mass fingerprinting analysis of p80.

**TABLE S4.** Summary of the peptide mass fingerprinting analysis of p70.

**TABLE S5.** Comparison of volumes for the spherical viral particle of dsRNA viruses.

**FIG. S1.** A schematic diagram showing the strategy used for full-length cDNA cloning of dsRNA-1 and dsRNA-2 of *Botrytis porri* RNA virus 1 in strain GarlicBc-72 of *Botrytis porri*.

The PCR primers and the 3'-adaptor used in the cDNA cloning are indicated on the diagram. The oligonucleotide sequences of the primers and the 3'-adaptor were listed in Table S1.

**FIG. S2.** Proline frequency profiles in the polypeptides encoded by ORF I and ORF II of BPRV1. Note the high proline frequency occurring in the region (221 to 264) on the ORF I-encoded polypeptide. Dotted line indicates the threshold value (0.33).

**FIG. S3.** The lesion length on detached garlic leaves (20 °C, 72 h) (**A**) and the mycelial growth rates on potato dextrose agar (20 °C) (**B**) for strains GarlicBc-38, OnionBc-95 and GP72SC35 of *Botrytis porri*, and the derivative isolates of strains GarlicBc-38 (72-38-1, 72-38-2, 72-38-3),

1 OnionBc-95 (72-95-1, 72-95-2, 72-95-3) and GP72SC35 (72-35-1, 72-35-2, 72-35-3) in pair  
2 cultures of GarlicBc-38/GarlicBc-72, OnionBc-95/GarlicBc-72 and GP72SC35/GarlicBc-72 in  
3 the horizontal transmission experiment. Each parameter for each strain/isolate was expressed as  
4 the arithmetic mean  $\pm$  S.E.M. Bars in graphs A or B labeled with the same letters are not  
5 significantly different ( $P > 0.05$ ) according to Least Significant Difference Test. The symbols “+”  
6 and “-” indicate the presence and the absence of dsRNA-1 or dsRNA-2, respectively, according  
7 to the results of dsRNA extraction from mycelia and detection by agarose gel electrophoresis.

8 **FIG. S4.** A schematic graph showing the results of peptide mass fingerprinting (PMF) analysis  
9 for capsid proteins p85, p80 and p70 of Botrytis porri RNA virus 1. The colored areas on each  
10 gray bar represent amino acid sequences detected by PMF matched the deduced amino acid  
11 sequences. Ion scores higher and lower than 46 indicate good match and bad match, respectively.

TABLE S1. Oligonucleotide primers/adaptor used in this study.

| Name                                       | Sequence (5' → 3')                        | Position <sup>1</sup>            | Polarity <sup>2</sup> |
|--------------------------------------------|-------------------------------------------|----------------------------------|-----------------------|
| to cDNA clone                              |                                           |                                  |                       |
| BP5-4 (primer)                             | CGTTCAGCGGGCACAATG                        | dsRNA-1: 2162–2145               | –                     |
| BP3 (primer)                               | GCGGTGGCTTAGGTTTGATGC                     | dsRNA-1: 5382–5402               | +                     |
| BPM3 (primer)                              | AGCGCTACGAGGGCACTGGA                      | dsRNA-1: 1396–1415               | +                     |
| BPM4 (primer)                              | GTCGTCATCGCTATCTCGCTCTTC                  | dsRNA-1: 2200–2177               | –                     |
| BPM5 (primer)                              | CCGTTGTAGAGGCAGGTATTGAGT                  | dsRNA-1: 2520–2543               | +                     |
| BPM6 (primer)                              | CATCTTCCCGTTTCTTGCTATTTT                  | dsRNA-1: 4144–4121               | –                     |
| BG1 (primer)                               | CACTGCTGCTCGCTCTG                         | dsRNA-2: 1695–1679               | –                     |
| BG2 (primer)                               | GCATCGGCAAGAGCACAGG                       | dsRNA-2: 3324–3342               | +                     |
| BPA (3'-adaptor)                           | TTCAAATCCTACTGGCGCCGTG-(NH <sub>2</sub> ) | to 3'-end of dsRNA               | +/-                   |
| RCBPA (primer)                             | CACGGCGCCAGTAGGATTTGAA                    | complementary to the adaptor BPA | -/+                   |
| to probe dsRNA-1 or dsRNA-2                |                                           |                                  |                       |
| BVP1F (primer)                             | AAGAGCTGCCTATTTGAA                        | dsRNA-1: 8–25                    | +                     |
| BVP1R (primer)                             | TGTGTTGTAAGGCATTTTG                       | dsRNA-1: 430–412                 | –                     |
| BVP2F (primer)                             | AGATGGTGCCGGCAGACGAGA                     | dsRNA-1: 4140–4160               | +                     |
| BVP2R (primer)                             | CCACCGACCCGACCGACAC                       | dsRNA-1: 4645–4627               | –                     |
| BVP3F (primer)                             | GCGGTGCCAGGTGCTTATTCTT                    | dsRNA-2: 3921–3942               | +                     |
| BVP3R (primer)                             | TCCGCTCAGTGGTTAGGCTCAG                    | dsRNA-2: 4371–4350               | –                     |
| To test cDNA inserts in the pMD18-T vector |                                           |                                  |                       |
| M13F-47                                    | CGCCAGGGTTTTCCAGTCACGAC                   | pMD18-T vector                   |                       |
| M13R-48                                    | AGCGGATAACAATTCACACAGGA                   | pMD18-T vector                   |                       |

<sup>1</sup> Positions for the PCR primers or the adaptor in the cDNA of dsRNA-1 or dsRNA-2 were labeled in FIG. S1.

<sup>2</sup> Polarity refers to the positive strand (+) and the negative strand (–) of dsRNA-1 or dsRNA-2.

TABLE S2. Summary of the peptide mass fingerprinting analysis of p85.

| Amino acid position | Calculated Mass | Observed Mass | $\pm$ delta | Amino acid sequence            | Ion Score |
|---------------------|-----------------|---------------|-------------|--------------------------------|-----------|
| 407–422             | 1846.8793       | 1846.8551     | -0.0242     | DTIAYNVVPGMSVYNR               | 137       |
| 462–475             | 1653.7295       | 1653.7417     | 0.0122      | GNNHIALGCTMYMR                 | <46       |
| 501–514             | 1556.7955       | 1556.7692     | -0.0263     | FLLPVEDGDDAPIR                 | <46       |
| 501–515             | 1684.8905       | 1684.8650     | -0.0255     | FLLPVEDGDDAPIRK                | 71        |
| 552–579             | 2984.5364       | 2984.5945     | 0.0581      | ITTYVTAGPGAPDLAVHSTIDLYVPEQR   | 183       |
| 580–594             | 1777.8789       | 1777.8539     | -0.025      | FTLCPLNGSELIEER                | 94        |
| 595–608             | 1573.6765       | 1573.6554     | -0.0211     | DSDDDGAFAKVDAYR                | <46       |
| 616–630             | 1903.9636       | 1903.9301     | -0.0335     | YLTAHNLWQQFPVMR                | 58        |
| 672–693             | 2317.2371       | 2317.2307     | -0.0064     | GVILGERDHQTSLHASVVTAAR         | <46       |
| 679–693             | 1592.8140       | 1592.7916     | -0.0224     | DHQTSLHASVVTAAR                | <46       |
| 781–804             | 2778.2021       | 2778.2322     | 0.0301      | ASSYLCMEETPEGEGWQVVFSESR       | <46       |
| 806–817             | 1595.7847       | 1595.7623     | -0.0224     | KQILQQEYCTER                   | <46       |
| 807–817             | 1467.6897       | 1467.6700     | -0.0197     | QILQQEYCTER                    | 78        |
| 818–828             | 1419.7301       | 1419.7113     | -0.0188     | EQLTCLWLTQK                    | <46       |
| 829–857             | 3187.5906       | 3187.6785     | 0.0879      | VAQENVGAVTTYQHEILPSESVSSTPQVVR | 83        |
| 870–885             | 1635.8741       | 1635.8542     | -0.0199     | GAPILWGTSTTAVAYK               | <46       |
| 989–1007            | 1999.1084       | 1998.9700     | -0.1384     | EGFLPVKGGARPTSVQVTR            | <46       |
| 1016–1026           | 1159.6140       | 1159.6176     | 0.0036      | SPMKVANSTPK                    | <46       |
| 1095–1105           | 1318.6096       | 1318.6554     | 0.0458      | YYDRGMDAALK                    | <46       |
| 1491–1509           | 2225.2112       | 2225.1196     | -0.0916     | QTTLINTILNLTYYHHIAMK           | <46       |
| 1549–1558           | 1095.5173       | 1095.6099     | 0.0926      | MGGMEINAIK                     | <46       |
| 1586–1598           | 1401.7122       | 1401.6222     | -0.0900     | SLASFVHGNVENK                  | <46       |

Note: The overall protein score is 791.

TABLE S3. Summary of the peptide mass fingerprinting analysis of p80.

| Amino acid position | Calculated Mass | Observed Mass | $\pm$ delta | Amino acid sequence              | Ion Score |
|---------------------|-----------------|---------------|-------------|----------------------------------|-----------|
| 289–315             | 1419.7301       | 3160.4287     | 0.0698      | SGQPVEEPEHAGWLSWLNDEDDTMFDR      | <46       |
| 382–398             | 1467.6897       | 2032.9447     | 0.0054      | AGYIDSYEVVQCTTDRR                | <46       |
| 407–422             | 1573.6765       | 1846.8710     | -0.0083     | DTIAYNVFPGMSVYNR                 | 137       |
| 423–445             | 1595.7847       | 2390.2266     | 0.0181      | AQPFNSTASVTPLSDILSAVEDK          | <46       |
| 462–475             | 1637.7345       | 1653.7310     | 0.0015      | GNNHIALGCTMYMR                   | <46       |
| 476–500             | 1653.7295       | 2744.2922     | -0.0347     | LMALEMLAEQGAATYIDLTAEGFNR        | <46       |
| 501–514             | 1556.7955       | 1556.7827     | -0.0128     | FLLPVEDGDDAPIR                   | <46       |
| 501–515             | 1777.8789       | 1684.8794     | -0.0111     | FLLPVEDGDDAPIRK                  | 57        |
| 519–551             | 1777.8789       | 3640.8281     | 0.0871      | SVVAHQPYNMITLPDQSADSDAILMYLAGNSR | <46       |
| 552–579             | 1846.8793       | 2984.5830     | 0.0466      | ITTYVTAGPGAPDLAVHSTIDLYVPEQR     | 190       |
| 580–594             | 1903.9636       | 1777.8689     | -0.0100     | FTLCPLNGSELIEER                  | 94        |
| 595–608             | 1903.9636       | 1573.6680     | -0.0085     | DSDDDGAFAKVDAYR                  | <46       |
| 616–630             | 2032.9393       | 1903.9479     | -0.0157     | YLTAHNLWQQFPVMR                  | 67        |
| 672–693             | 2317.2371       | 2317.2339     | -0.0032     | GVILGERDHQTSLHASVVTAAR           | <46       |
| 679–693             | 2390.2085       | 1592.8114     | -0.0026     | DHQTSLHASVVTAAR                  | <46       |
| 781–804             | 2744.3269       | 2778.2292     | 0.02710     | ASSYLCMEETPEGEGWQVVFSESR         | <46       |
| 806–817             | 2794.1970       | 1595.7775     | -0.0072     | KQILQQEYCTER                     | <46       |
| 807–817             | 2984.5364       | 1467.6798     | -0.0099     | QILQQEYCTER                      | 77        |
| 818–828             | 3160.3589       | 1419.7208     | -0.0093     | EQLTCLWLTQK                      | <46       |
| 829–857             | 3187.5906       | 3187.6575     | 0.0669      | VAQENVGAVTYYYQHEILPSESVS DTPVVR  | 90        |
| 870–885             | 3187.5906       | 1635.8646     | -0.0095     | GAPILWGTSTTAVAYK                 | <46       |
| 1095–1105           | 3640.7410       | 1318.6613     | 0.0517      | YYDRGMDAALK                      | <46       |
| 1491–1509           | 1318.6096       | 2225.1206     | -0.0906     | QTTLINTILNLTYHHIAMK              | <46       |

Note: The overall protein score is 817.

TABLE S4. Summary of the peptide mass fingerprinting analysis of p70.

| Amino acid position | Calculated Mass | Observed Mass | $\pm$ delta | Amino acid sequence       | Ion Score |
|---------------------|-----------------|---------------|-------------|---------------------------|-----------|
| 263–276             | 1467.7732       | 1467.704      | -0.0692     | LISMTGALMAKMGK            | <46       |
| 311–334             | 2724.3489       | 2724.3506     | 0.0017      | VGTAAYTDKHSVNLWSYRPTSAQSR | <46       |
| 319–334             | 1888.9413       | 1888.9532     | 0.0119      | HSVNLWSYRPTSAQSR          | 47        |
| 337–348             | 1235.6379       | 1235.6412     | 0.0033      | AVNTGIGYTSPR              | 64        |
| 370–378             | 1081.5347       | 1081.5372     | 0.0025      | DYIVLGDMR                 | <46       |
| 380–387             | 1036.5463       | 1036.5413     | -0.005      | KVPSEWYK                  | <46       |
| 453–466             | 1654.8411       | 1654.8546     | 0.0135      | IMEAVAHAWEWAIK            | <46       |
| 505–521             | 2049.0176       | 2049.0256     | 0.008       | TDLSIVPTYTYQTDIR          | 98        |
| 657–667             | 1143.6190       | 1143.6218     | 0.0028      | GIPMISIAGER               | <46       |
| 714–723             | 1216.5845       | 1216.5865     | 0.002       | YLEETFTTGR                | 84        |
| 753–765             | 1404.7845       | 1404.7924     | 0.0079      | EATSVFVTKPVAR             | <46       |
| 1424–1436           | 1481.7053       | 1481.7192     | 0.0139      | MGEFSDPNAITRK             | <46       |
| 1778–1786           | 1095.5615       | 1095.6187     | 0.0572      | SWTRAMLSK                 | <46       |

Note: The overall protein score is 322.

TABLE S5. Comparison of volumes for the spherical viral particle of dsRNA viruses.

| Virus genus                   | Largest size of dsRNA<br>in one viral particle (bp) | Diameter of viral<br>particle (nm) | Volume of viral particle<br>( nm <sup>3</sup> ) <sup>a</sup> | Length of dsRNA per<br>unit volume (bp/nm <sup>3</sup> ) |
|-------------------------------|-----------------------------------------------------|------------------------------------|--------------------------------------------------------------|----------------------------------------------------------|
| <b>Birnaviridae</b>           |                                                     |                                    |                                                              |                                                          |
| Aquabirnavirus                | 6×10 <sup>3</sup>                                   | 70                                 | 1.80×10 <sup>5</sup>                                         | 0.03                                                     |
| Avibirnavirus                 | 6×10 <sup>3</sup>                                   | 70                                 | 1.80×10 <sup>5</sup>                                         | 0.03                                                     |
| Blosnavirus                   | 6×10 <sup>3</sup>                                   | 70                                 | 1.80×10 <sup>5</sup>                                         | 0.03                                                     |
| Entomobirnavirus              | 6.5×10 <sup>3</sup>                                 | 70                                 | 1.80×10 <sup>5</sup>                                         | 0.03                                                     |
| <b>Cystoviridae</b>           |                                                     |                                    |                                                              |                                                          |
| Cystovirus                    | 13.3×10 <sup>3</sup>                                | 85                                 | 3.22×10 <sup>5</sup>                                         | 0.04                                                     |
| <b>Chrysoviridae</b>          |                                                     |                                    |                                                              |                                                          |
| Chrysovirus                   | 3.5×10 <sup>3</sup>                                 | 35 - 40                            | 2.24×10 <sup>4</sup> - 3.35×10 <sup>4</sup>                  | 0.10 - 0.16                                              |
| <b>Partitiviridae</b>         |                                                     |                                    |                                                              |                                                          |
| Alphacryptovirus              | 2×10 <sup>3</sup>                                   | 30                                 | 1.41×10 <sup>4</sup>                                         | 0.14                                                     |
| Betacryptovirus               | 2.25×10 <sup>3</sup>                                | 40                                 | 3.35×10 <sup>4</sup>                                         | 0.07                                                     |
| Cryspovirus                   | 2.1×10 <sup>3</sup>                                 | 30 - 35                            | 1.41×10 <sup>4</sup> - 2.24×10 <sup>4</sup>                  | 0.09 - 0.15                                              |
| Partitivirus                  | 2.1×10 <sup>3</sup>                                 | 30 - 35                            | 1.41×10 <sup>4</sup> - 2.24×10 <sup>4</sup>                  | 0.09 - 0.15                                              |
| <b>Picobirnaviridae</b>       |                                                     |                                    |                                                              |                                                          |
| Picobirnavirus                | 4×10 <sup>3</sup>                                   | 35                                 | 2.24×10 <sup>4</sup> - 3.35×10 <sup>4</sup>                  | 0.12 - 0.18                                              |
| <b>Reoviridae<sup>b</sup></b> |                                                     |                                    |                                                              |                                                          |
| Aquareovirus                  | 1.8×10 <sup>4</sup> - 3.1×10 <sup>4</sup>           | 75                                 | 2.21×10 <sup>5</sup>                                         | 0.08 - 0.14                                              |
| Coltivirus                    | 2.9×10 <sup>4</sup>                                 | 60 - 80                            | 1.13×10 <sup>5</sup> - 2.68×10 <sup>5</sup>                  | 0.11 - 0.26                                              |
| Cypovirus                     | 2.5×10 <sup>4</sup>                                 | 65                                 | 1.44×10 <sup>5</sup>                                         | 0.17                                                     |
| Dinovernavirus                | 2.3×10 <sup>4</sup>                                 | 50                                 | 6.54×10 <sup>4</sup>                                         | 0.35                                                     |
| Fijivirus                     | 2.7×10 <sup>4</sup>                                 | 70                                 | 1.80×10 <sup>5</sup>                                         | 0.15                                                     |
| mycoreovirus                  | 2.3×10 <sup>4</sup>                                 | 80                                 | 2.68×10 <sup>5</sup>                                         | 0.09                                                     |
| Idnoreovirus                  | 2.7×10 <sup>4</sup> - 3.1×10 <sup>4</sup>           | 70                                 | 1.80×10 <sup>5</sup>                                         | 0.15 - 0.17                                              |
| Orthoreovirus                 | 2.4×10 <sup>4</sup>                                 | 80                                 | 2.68×10 <sup>5</sup>                                         | 0.09                                                     |
| Oryzavirus                    | 2.6×10 <sup>4</sup>                                 | 70                                 | 1.80×10 <sup>5</sup>                                         | 0.14                                                     |
| Cardoreovirus                 | 1.9×10 <sup>4</sup>                                 | 55                                 | 8.71×10 <sup>4</sup>                                         | 0.22                                                     |

|                         |                                     |         |                                       |             |
|-------------------------|-------------------------------------|---------|---------------------------------------|-------------|
| Orbivirus               | $1.9 \times 10^4$                   | 80      | $2.68 \times 10^5$                    | 0.07        |
| Mimoreovirus            | $2.5 \times 10^4$                   | 90 - 95 | $3.81 \times 10^5 - 4.49 \times 10^5$ | 0.06 - 0.07 |
| Phytoreovirus           | $2.6 \times 10^4$                   | 70      | $1.80 \times 10^5$                    | 0.14        |
| Rotavirus               | $1.9 \times 10^4$                   | 80      | $2.68 \times 10^5$                    | 0.07        |
| Seadornavirus           | $2.1 \times 10^4$                   | 60      | $1.13 \times 10^5$                    | 0.19        |
| <b>Totiviridae</b>      |                                     |         |                                       |             |
| Giardiavirus            | $6.3 \times 10^3$                   | 36      | $2.40 \times 10^4$                    | 0.25        |
| Leishmaniavirus         | $5.3 \times 10^3$                   | 33      | $1.90 \times 10^4$                    | 0.28        |
| Totivirus               | $4.6 \times 10^3 - 6.7 \times 10^3$ | 40      | $3.35 \times 10^4$                    | 0.14 - 0.20 |
| Victorivirus            | $4.6 \times 10^3 - 6.7 \times 10^3$ | 40      | $3.35 \times 10^4$                    | 0.14 - 0.20 |
| <b>Megabirnaviridae</b> |                                     |         |                                       |             |
| Megabirnavirus          | $8.9 \times 10^3$                   | 50      | $6.54 \times 10^4$                    | 0.14        |
| <b>Unassigned</b>       |                                     |         |                                       |             |
| BpRV1 <sup>c</sup>      | $6.2 \times 10^3 / 1.2 \times 10^4$ | 35      | $3.35 \times 10^4$                    | 0.28/0.53   |

\* All viral information was obtained from ViralZone (<http://viralzone.expasy.org/>).

<sup>a</sup> The volumes of different viral particles were calculated with the diameter of corresponding viral particle by using the volume formula of a sphere.

<sup>b</sup> To simplify the calculation, the genome for all viruses in Reoviridae were temporarily considered to be encapsidated in one viral particle.

<sup>c</sup> the data for BpRV1 were calculated twice as two dsRNAs were encapsidated separately or together.



FIG. S1

dsRNA-1 (6215 bp)

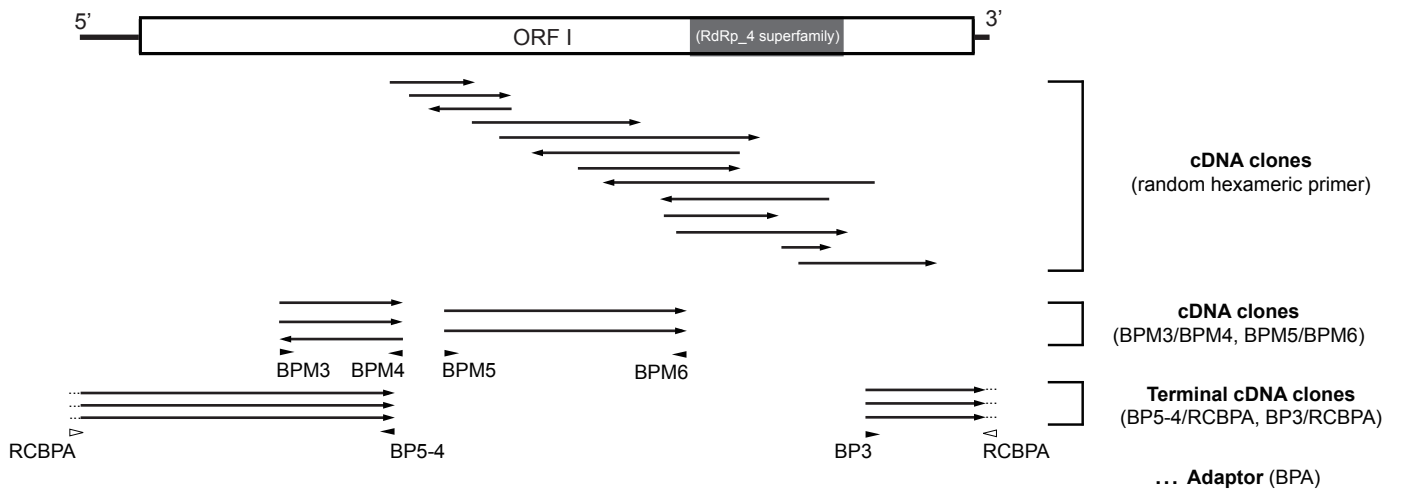

dsRNA-2 (5879 bp)

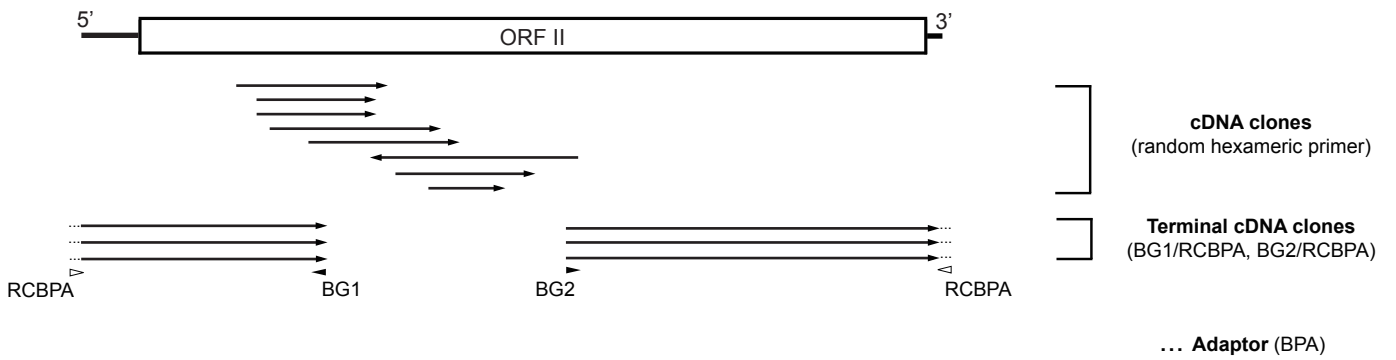

FIG. S2

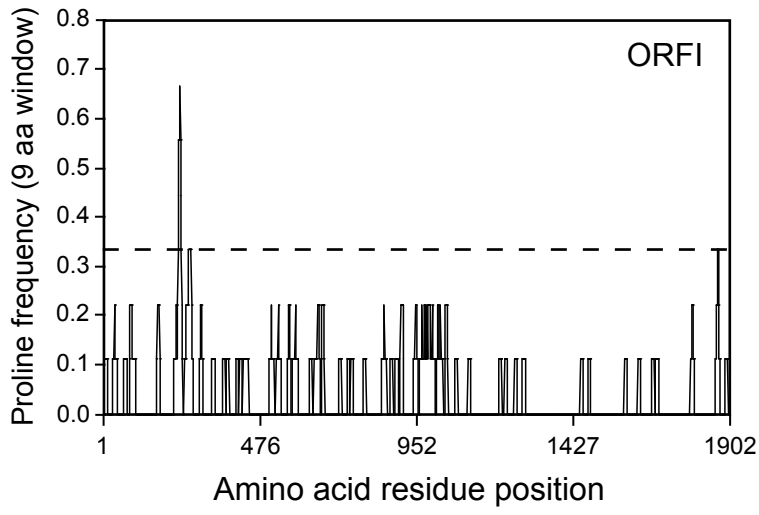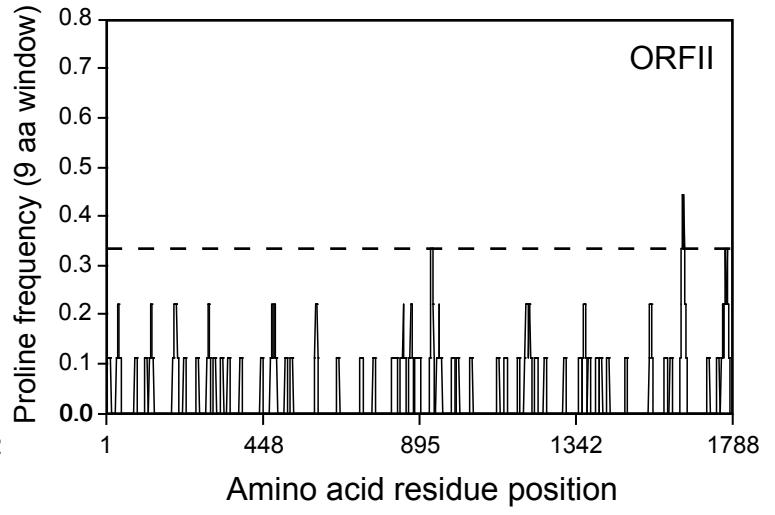

Fig. S3

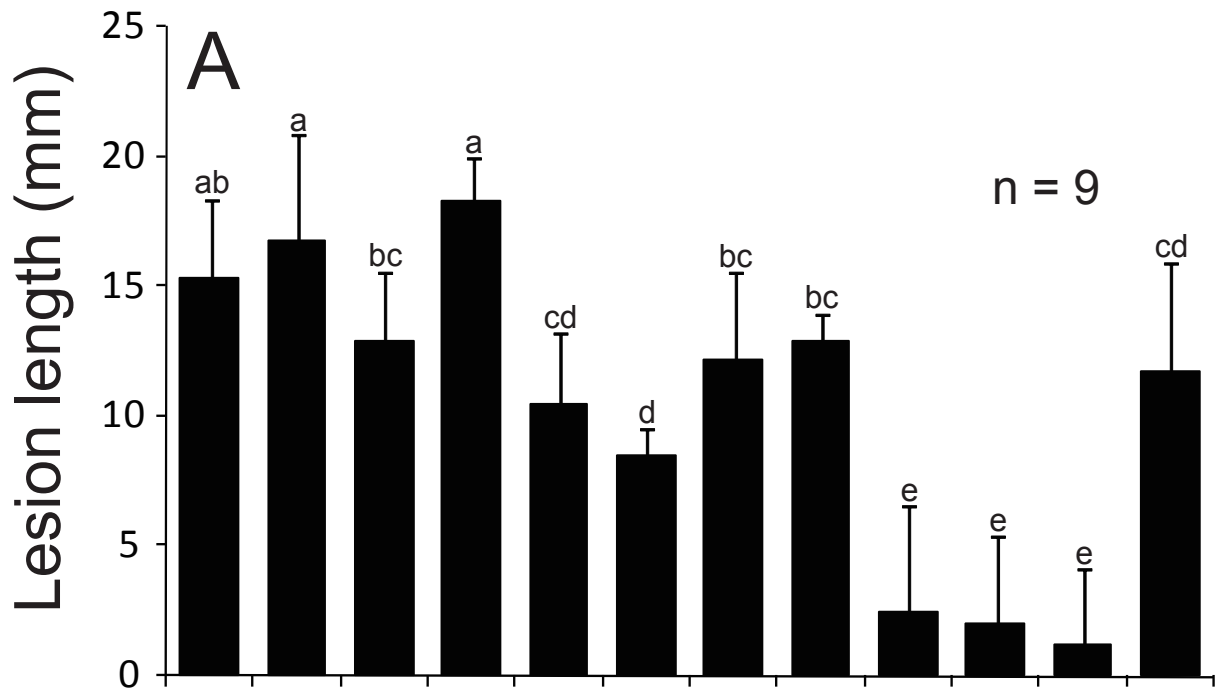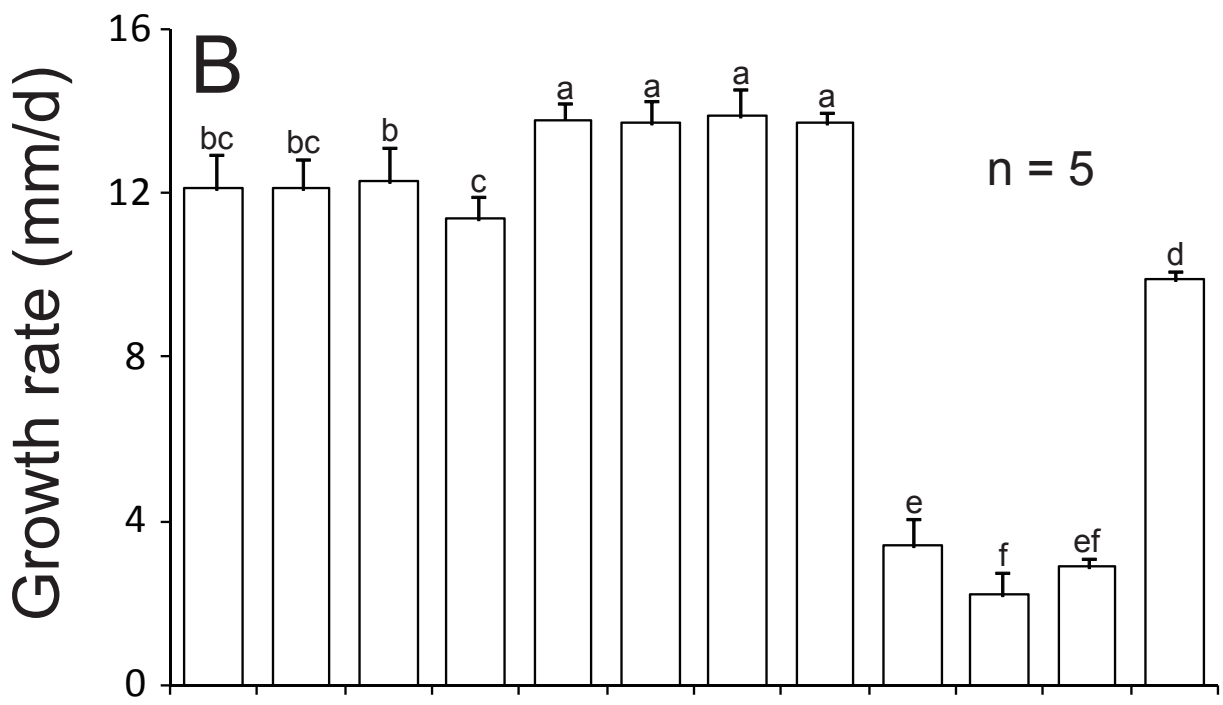

|         | 72-38-1 | 72-38-2 | 72-38-3 | GarlicBc-38 | 72-95-1 | 72-95-2 | 72-95-3 | OnionBc-95 | 72-35-1 | 72-35-2 | 72-35-3 | GP72SC35 |
|---------|---------|---------|---------|-------------|---------|---------|---------|------------|---------|---------|---------|----------|
| dsRNA-1 | -       | -       | -       | -           | -       | -       | -       | -          | +       | +       | +       | -        |
| dsRNA-2 | -       | -       | -       | -           | -       | -       | -       | -          | +       | +       | +       | -        |

Fig. S4

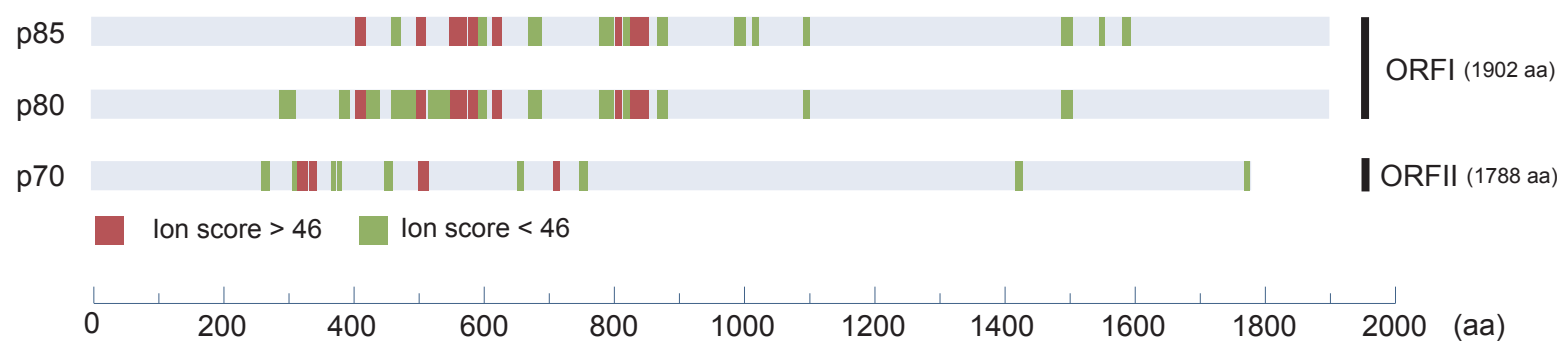

Supplement: supp_86.12.6605_TableS1-S5_FigS1-S4.pdf [file supp_86.12.6605_TableS1-S5_FigS1-S4.pdf]
